# Supplementary material for: A common polymorphism in the mechanosensitive ion channel PIEZO1 is associated with protection from severe malaria in humans
Source: PubMed Central journal article supplement — Proc Natl Acad Sci U S A. 2020 Apr 7;117(16):9074–81. doi: 10.1073/pnas.1919843117 (PMC7183233; doi:10.1073/pnas.1919843117), 2020-04-07
Supplement: pnas.1919843117.sapp.pdf [file pnas.1919843117.sapp.pdf]

# PNAS

[www.pnas.org](http://www.pnas.org)

Supplementary Information for

**A common polymorphism in the mechanosensitive ion channel *PIEZO1* is associated with protection from severe malaria in humans**

Christian N. Nguetse, Natasha Purington, Emily R. Ebel, Bikash Shakya, Marilou Tetard, Peter G. Kremsner, Thirumalaisamy P. Velavan, and Elizabeth S. Egan

Elizabeth S. Egan

Email: [eeegan@stanford.edu](mailto:eeegan@stanford.edu)

**This PDF file includes:**

Figures S1 to S4

Tables S1 to S9

**Table S1.** Baseline demographics by study

| <b>Baseline characteristic</b>                                                               | <b>Overall<br/>(n=446)</b>    | <b>Study</b>                       |                               |                                   |
|----------------------------------------------------------------------------------------------|-------------------------------|------------------------------------|-------------------------------|-----------------------------------|
|                                                                                              |                               | <b><i>Kremsner</i><br/>(n=195)</b> | <b><i>Kun</i><br/>(n=195)</b> | <b><i>Kalmbach</i><br/>(n=56)</b> |
| Sex, n (%)                                                                                   |                               |                                    |                               |                                   |
| Male                                                                                         | 201 (45%)                     | 104 (53%)                          | 74 (38%)                      | 23 (41%)                          |
| Female                                                                                       | 245 (55%)                     | 91 (47%)                           | 121 (62%)                     | 33 (59%)                          |
| Age in months, median (range)                                                                | 35 (4, 140)                   | 25 (12, 103)                       | 41 (8, 140)                   | 36 (4, 120)                       |
| Parasite density (parasite/ $\mu$ L) <sup>1</sup> , geometric mean (95% confidence interval) | 34,664.9 (34,649.5, 34,680.3) | 26,552.0 (26,536, 26,568.1)        | 42,643.6 (42,626.9, 42,660.3) | 34,581.9 (34,572.7, 34,591.0)     |
| Severe malaria, n (%)                                                                        | 253 (57%)                     | 146 (75%)                          | 97 (50%)                      | 10 (18%)                          |

Continuous and categorical variables were compared across malaria status using the Wilcoxon rank sum test and Fisher's exact test, respectively. <sup>1</sup>n=44 excluded due to zero values.

**Table S2:** Hardy-Weinberg equilibrium (HWE) for *PIEZO1* E756del polymorphism in case and control groups according to expected and observed values.

|                 | WT/WT | WT/DEL | DEL/DEL | Chi-Square | HWE p-value |
|-----------------|-------|--------|---------|------------|-------------|
| <b>Cases</b>    |       |        |         |            |             |
| Observed        | 180   | 58     | 15      | 10.34      | 0.0013      |
| Expected        | 172.7 | 72.7   | 7.7     |            |             |
| <b>Controls</b> |       |        |         |            |             |
| Observed        | 118   | 69     | 6       | 1.18       | 0.28        |
| Expected        | 120.5 | 64     | 8.5     |            |             |

If  $P < 0.05$  - not consistent with HWE.

**Table S3.** Associations with malaria severity – multiple imputation (n=534)<sup>†</sup>

| <b>Characteristic</b> | <b>Mild malaria</b> | <b>Severe malaria</b> | <b>Odds ratio (95% CI)</b> |
|-----------------------|---------------------|-----------------------|----------------------------|
| PIEZO1 E756Del        |                     |                       |                            |
| WT/WT                 | 63%                 | 71%                   | reference                  |
| WT/DEL                | 34%                 | 23%                   | 0.54** (0.35, 0.84)        |
| DEL/DEL               | 3%                  | 6%                    | 2.11 (0.82, 5.42)          |
| Hemoglobin            |                     |                       |                            |
| AA                    | 80%                 | 95%                   | reference                  |
| AS                    | 20%                 | 5%                    | 0.22*** (0.11, 0.42)       |
| Age                   | 40 (4, 140)         | 28 (4, 133)           | 0.98*** (0.97, 0.99)       |
| Male                  | 48%                 | 44%                   | 0.69 (0.44, 1.09)          |

Note: \* p < 0.05, \*\* p < 0.01, \*\*\* p < 0.001. Model also adjusted for study in which the data was collected.

<sup>†</sup>Multiple imputation resulted in 5 imputed data sets, thus only percentages by malaria status are shown for the pooled data.

**Table S4.** Associations with malaria severity including hemoglobin type: multiple imputation (n=534) †

| <b>Characteristic</b>             | <b>Odds ratio (95% CI)</b> |
|-----------------------------------|----------------------------|
| PIEZO1 E756Del (ref=WT/WT)        |                            |
| WT/DEL                            | 0.51** (0.33, 0.80)        |
| DEL/DEL                           | 1.38 (0.53, 3.59)          |
| Hemoglobin AS (ref=AA)            | 0.15*** (0.07, 0.34)       |
| PIEZO1 and Hemoglobin interaction |                            |
| WT/DEL * AS                       | 2.26 (0.57, 8.92)          |
| DEL/DEL * AS                      | 19.73 (0.82, 476.59)       |
| Age                               | 0.98*** (0.97, 0.99)       |
| Male                              | 0.70 (0.45, 1.10)          |

Note: \* p < 0.05, \*\* p < 0.01, \*\*\* p < 0.001. Bayesian logistic model also adjusted for study in which the data was collected. Interaction p = 0.11.

†Multiple imputation resulted in 5 imputed data sets, thus only percentages by malaria status are shown for the pooled data.

**Table S5.** Associations with malaria severity among other PIEZO1 variants (n=532<sup>1</sup>)

| PIEZO1 variant                  | Malaria status  |                   | Odds ratio<br>(95% CI) |
|---------------------------------|-----------------|-------------------|------------------------|
|                                 | Mild<br>(n=252) | Severe<br>(n=280) |                        |
| <b>E756EE</b>                   |                 |                   |                        |
| WT/WT                           | 248 (98.4%)     | 277 (98.9%)       | 1.49 (0.33, 7.62)      |
| WT/DEL                          | 4 (1.6%)        | 3 (1.1%)          | reference              |
| <b>E755-E756Del<sup>2</sup></b> |                 |                   |                        |
| WT/WT                           | 252 (100%)      | 274 (97.9%)       | 0.07 (0.00, 1.23)      |
| WT/DEL                          | 0               | 6 (2.1%)          | reference              |
| <b>E750Q</b>                    |                 |                   |                        |
| WT/WT                           | 236 (93.7%)     | 264 (94.3%)       | 1.12 (0.54, 2.30)      |
| WT/DEL                          | 16 (6.3%)       | 16 (5.7%)         | reference              |
| <b>Q749-E750Del<sup>2</sup></b> |                 |                   |                        |
| WT/WT                           | 252 (100%)      | 279 (99.6%)       | 0.32 (0.01, 8.07)      |
| WT/DEL                          | 0               | 1 (0.4%)          | reference              |
| <b>Q749Del</b>                  |                 |                   |                        |
| WT/WT                           | 240 (95.2%)     | 255 (91.1%)       | 0.51 (0.24, 1.02)      |
| WT/DEL                          | 12 (4.8%)       | 22 (7.9%)         | reference              |
| DEL/DEL                         | 0               | 3 (1.1%)          |                        |
| <b>Q749E</b>                    |                 |                   |                        |
| WT/WT                           | 251 (99.6%)     | 275 (98.2%)       | 0.22 (0.01, 1.37)      |
| WT/DEL                          | 1 (0.4%)        | 5 (1.8%)          | reference              |
| <b>E739Q<sup>2</sup></b>        |                 |                   |                        |
| WT/WT                           | 250 (99.2%)     | 280 (100%)        | 6.19 (0.31, 124.48)    |
| WT/DEL                          | 2 (0.8%)        | 0                 | reference              |
| <b>At least 1 non-WT</b>        |                 |                   |                        |
| WT/WT                           | 217 (86.1%)     | 227 (81.1%)       | 1.45 (0.91, 2.32)      |
| WT/DEL                          | 35 (13.9%)      | 53 (18.9%)        | reference              |

<sup>1</sup> n=10 excluded due to missing values.

<sup>2</sup> Due to estimation issues, fit using Bayesian logistic regression.

**Table S6.** Prevalence of *PIEZO1* E756del genotypes among different populations from the 1000 Genomes Project Phase 3\* (31)

| Population         | Genotype: frequency |                  |                |
|--------------------|---------------------|------------------|----------------|
|                    | Ref_homozygous      | Alt_heterozygous | Alt_homozygous |
| <b>AFRICAN</b>     | WT/WT: 0.660        | WT/DEL: 0.286    | DEL/DEL: 0.035 |
| ACB                | WT/WT: 0.677        | WT/DEL: 0.281    | DEL/DEL: 0.042 |
| ASW                | WT/WT: 0.721        | WT/DEL: 0.213    | DEL/DEL: 0.033 |
| ESN                | WT/WT: 0.596        | WT/DEL: 0.343    | DEL/DEL: 0.040 |
| GWD                | WT/WT: 0.566        | WT/DEL: 0.345    | DEL/DEL: 0.053 |
| LWK                | WT/WT: 0.798        | WT/DEL: 0.172    |                |
| MSL                | WT/WT: 0.647        | WT/DEL: 0.306    | DEL/DEL: 0.035 |
| YRI                | WT/WT: 0.648        | WT/DEL: 0.306    | DEL/DEL: 0.037 |
| <b>AMRERICAN</b>   | WT/WT: 0.960        | WT/DEL: 0.037    |                |
| CLM                | WT/WT: 0.926        | WT/DEL: 0.064    |                |
| MXL                | WT/WT: 1.000        |                  |                |
| PEL                | WT/WT: 1.000        |                  |                |
| PUR                | WT/WT: 0.933        | WT/DEL: 0.067    |                |
| <b>EAST ASIAN</b>  | WT/WT: 0.998        | WT/DEL: 0.002    |                |
| CDX                | WT/WT: 0.989        | WT/DEL: 0.011    |                |
| CHB                | WT/WT: 1.000        |                  |                |
| CHS                | WT/WT: 1.000        |                  |                |
| JPT                | WT/WT: 1.000        |                  |                |
| KHV                | WT/WT: 1.000        |                  |                |
| <b>EUROPEAN</b>    | WT/WT: 0.990        | WT/DEL: 0.002    |                |
| CEU                | WT/WT: 1.000        |                  |                |
| FIN                | WT/WT: 0.990        | WT/DEL: 0.010    |                |
| GBR                | WT/WT: 1.000        |                  |                |
| IBS                | WT/WT: 1.000        |                  |                |
| TSI                | WT/WT: 0.963        |                  |                |
| <b>SOUTH ASIAN</b> | WT/WT: 0.982        | WT/DEL: 0.010    |                |
| BEB                | WT/WT: 0.953        | WT/DEL: 0.023    |                |
| GIH                | WT/WT: 0.990        | WT/DEL: 0.010    |                |
| ITU                | WT/WT: 1.000        |                  |                |
| PJL                | WT/WT: 0.979        | WT/DEL: 0.010    |                |
| STU                | WT/WT: 0.980        | WT/DEL: 0.010    |                |

\*Ensembl GRCh37 release 99. ACB: African Caribbeans in Barbados; ASW: Americans of African Ancestry in Southwest USA; ESN: Esan in Nigeria; GWD: Gambian in Western Divisions in the Gambia; LWK: Luhya in Webuye, Kenya; MSL: Mende in Sierra Leone; YRI: Yoruba in Ibadan, Nigeria; CLM: Colombians from Medellin, Colombia; MXL: Mexican Ancestry from Los Angeles USA; PEL: Peruvians from Lima, Peru; PUR: Puerto Ricans from Puerto Rico; CDX: Chinese Dai in Xishuangbanna, China; CHB: Han Chinese in Beijing, China; CHS: Southern Han Chinese; JPT: Japanese in Tokyo, Japan; KHV: Kinh in Ho Chi Minh City, Vietnam; CEU: Utah Residents with Northern and Western European Ancestry; FIN: Finnish in Finland; GBR: British in England and Scotland; IBS: Iberian Population in Spain; TSI: Toscani in Italia; BEB: Bengali from Bangladesh; GIH: Gujarati Indian from Houston, Texas; ITU: Indian Telugu from the UK; PJL: Punjabi from Lahore, Pakistan; SRI: Sri Lankan Tamil from the UK. Ref: Reference; Alt: Alternate.

**Table S7.** Demographic characteristics of ethnicity subset versus full cohort

| <b>Characteristic</b>                   | <b>Ethnicity Subset<br/>(n=182)</b> | <b>Full cohort<br/>(n=446)</b> |
|-----------------------------------------|-------------------------------------|--------------------------------|
| <b>Sex, n (%)</b>                       |                                     |                                |
| Female                                  | 109 (60%)                           | 245 (55%)                      |
| Male                                    | 73 (40%)                            | 201 (45%)                      |
| <b>Age, median [range]</b>              | 40 [8-140]                          | 35 [4-140]                     |
| <b>PIEZO1 E756del variant, n (%)</b>    |                                     |                                |
| WT/WT                                   | 113 (62%)                           | 298 (67%)                      |
| WT/DEL                                  | 55 (30%)                            | 127 (28%)                      |
| DEL/DEL                                 | 14 (8%)                             | 21 (5%)                        |
| <b>Parasite density, median [range]</b> | 39,500 [20-1,200,000]               | 35,000 [20-1,544,880]          |



**Table S8.** Associations with malaria severity for ethnicity subset (n=182) versus original model (n=446): main effects

| <b>Characteristic</b>                | <b>Including ethnic group</b><br>Odds ratio (95% CI) | <b>Original model†</b><br>Odds ratio (95% CI) |
|--------------------------------------|------------------------------------------------------|-----------------------------------------------|
| <b>PIEZO1 E756del</b>                | <i>Global p-value=0.056</i>                          | <i>Global p-value=0.007</i>                   |
| WT/DEL                               | 0.52 (0.26, 1.02)                                    | 0.50** (0.31, 0.81)                           |
| DEL/DEL                              | 2.62 (0.76, 10.84)                                   | 2.26 (0.82, 6.94)                             |
| <b>Hemoglobin type AS</b>            | 0.35* (0.14, 0.86)                                   | 0.27*** (0.13, 0.52)                          |
| <b>Age</b>                           | 1.00 (0.98, 1.01)                                    | 0.98*** (0.97, 0.99)                          |
| <b>Male</b>                          | 0.95 (0.50, 1.80)                                    | 0.70 (0.45, 1.08)                             |
| <b>Primary Gabonese ethnic group</b> | <i>Global p-value=0.11</i>                           |                                               |
| Fang                                 | 0.89 (0.39, 2.01)                                    |                                               |
| Omyene                               | 0.49 (0.14, 1.53)                                    |                                               |
| Other                                | 1.73 (0.81, 3.75)                                    |                                               |

† additionally included study in model; \*p<0.05; \*\*p<0.01; \*\*\*p<0.001

**Table S9.** Associations with malaria severity for ethnicity subset (n=182) versus original model (n=446): interaction model

| <b>Characteristic</b>                | <b>Including ethnic group</b><br>Odds ratio (95% CI) | <b>Original model†</b><br>Odds ratio (95% CI) |
|--------------------------------------|------------------------------------------------------|-----------------------------------------------|
| <b>PIEZO1 E756del</b>                | <i>Global p-value=0.057</i>                          | <i>Global p-value=0.007</i>                   |
| WT/DEL                               | 0.40* (0.19, 0.83)                                   | 0.46** (0.28, 0.75)                           |
| DEL/DEL                              | 1.18 (0.30, 5.29)                                    | 1.34 (0.45, 4.35)                             |
| <b>Hemoglobin type AS</b>            | 0.10** (0.01, 0.40)                                  | 0.16*** (0.06, 0.38)                          |
| <b>PIEZO1*Hemoglobin</b>             | <i>Global p-value=0.013</i>                          | <i>Global p-value=0.047</i>                   |
| WT/DEL:AS                            | 8.29* (1.07, 83.03)                                  | 2.74 (0.53, 13.02)                            |
| DEL/DEL:AS                           | Inf (0, NA)                                          | Inf (0, NA)                                   |
| <b>Age</b>                           | 1.00 (0.99, 1.01)                                    | 0.98*** (0.97, 0.99)                          |
| <b>Male</b>                          | 0.94 (0.49, 1.81)                                    | 0.70 (0.45, 1.10)                             |
| <b>Primary Gabonese ethnic group</b> | <i>Global p-value: 0.11</i>                          |                                               |
| Fang                                 | 0.85 (0.37, 1.96)                                    |                                               |
| Omyene                               | 0.59 (0.17, 1.90)                                    |                                               |
| Other                                | 1.79 (0.82, 4.00)                                    |                                               |

† additionally included study in model; \*p<0.05; \*\*p<0.01; \*\*\*p<0.001

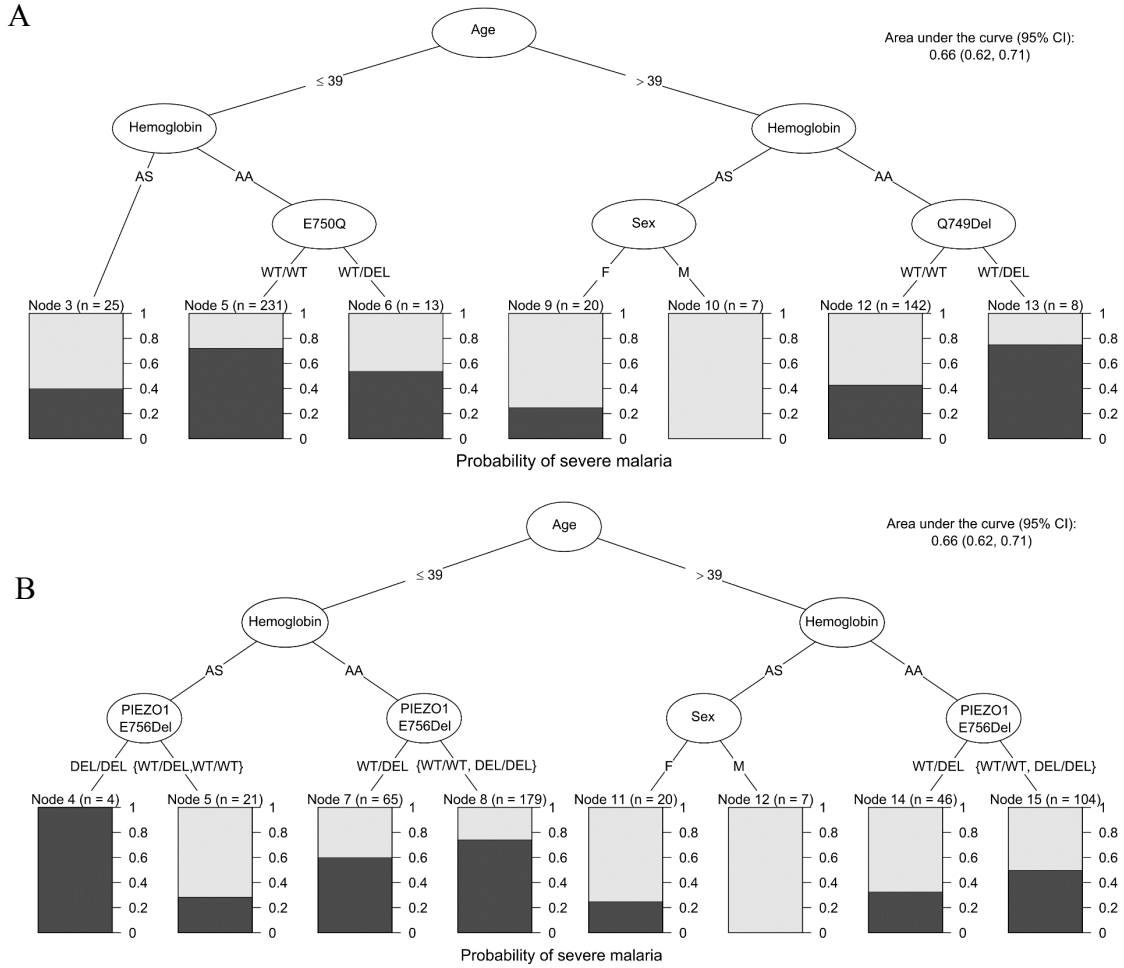

**Figure S1.** Classification trees predicting severe malaria with various possible predictors included. (A) Possible predictors: all PIEZO1 variants except for E756del, hemoglobin type, sex, and age. (B) Possible predictors: all PIEZO1 variants, hemoglobin type, sex, and age. The higher the black bars, the higher the likelihood of severe malaria.

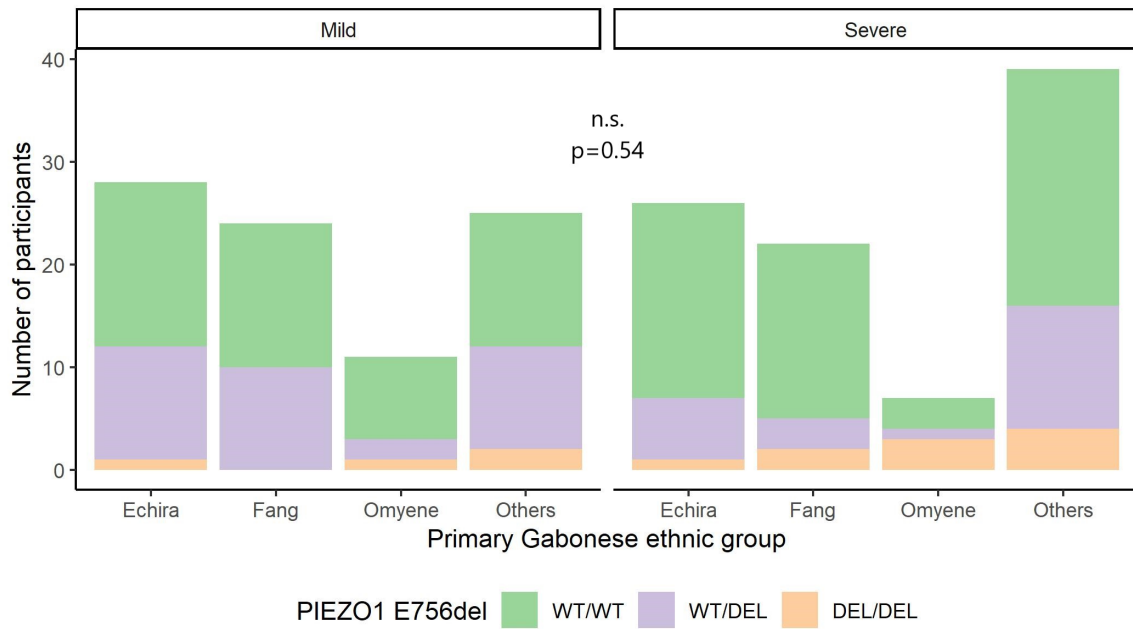

**Figure S2.** Bar plots depicting the distribution of *PIEZO1* E756del within each primary Gabonese ethnic group category by malaria status (mild versus severe). A logistic model for malaria severity as a function of E756del, ethnic group, and their interaction was fit; ns= not significant,  $p=0.54$ .

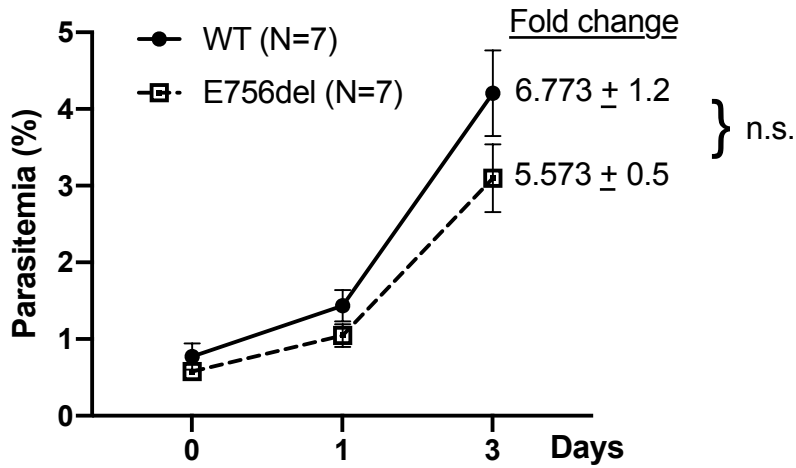

**Figure S3.** Growth of *P. falciparum* strain 3D7 growth in previously cryopreserved erythrocytes from wild-type or PIEZO1 E756del donors. Each point represents mean raw parasitemia of N=7 donors for each genetic background, and error bars represent SEM. Each sample was run with two technical replicates. “Fold change” indicates the average fold difference ( $\pm$ SEM) in parasitemia on day 3 relative to day 0. n.s., not significant, p-value=0.3725. SEM=Standard error of mean.

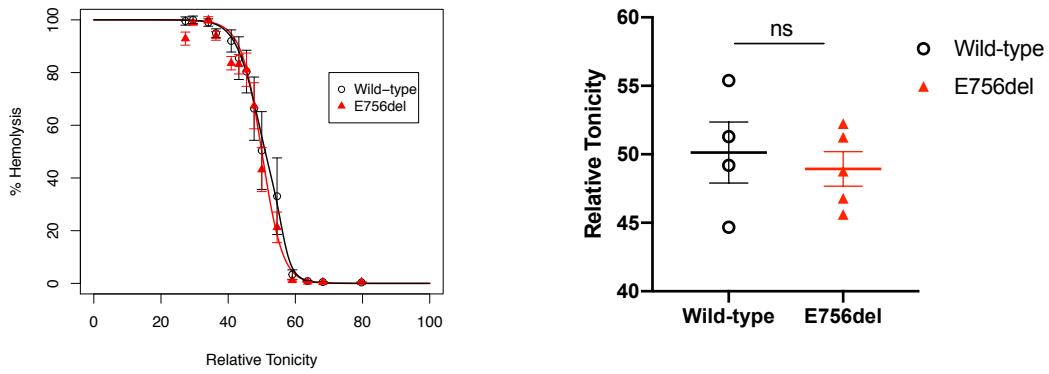

**Figure S4.** Osmotic fragility assays using samples stored overnight at 4°C. (A) RBCs from wild-type donors (N=4) had similar osmotic fragility curves to those from donors with the PIEZO1 E756del mutation (N=5). (B) Quantification of osmotic fragility based on relative tonicity at 50% hemolysis. ns= not significant, p=0.635.
